# Supplementary material for: Prediction of cytotoxicity of heavy metals adsorbed on nano-TiO2 with periodic table descriptors using machine learning approaches
Source: Beilstein J Nanotechnol. 2023 Sep 12;14:939–50. doi: 10.3762/bjnano.14.77 (PMC10509545; doi:10.3762/bjnano.14.77)
Supplement: File 1 — Detailed information regarding heavy metals at different concentrations. [file Beilstein_J_Nanotechnol-14-939-s001.xlsx]

## Sheet: Title
Prediction of cytotoxicity of heavy metals adsorbed on nano-TiO2 with periodic table-based descriptors using machine learning (ML) approaches
Joyita Roya, Souvik Porea, Kunal Roya*
aDrug Theoretics and Cheminformatics Laboratory,
Department of Pharmaceutical Technology,
Jadavpur University,
Kolkata, 700032, India
*Corresponding authors
Prof. Kunal Roy, Phone: +91 98315 94140; Fax: +91-33-2837-1078
Email: kunalroy_in@yahoo.com; kunal.roy@jadavpuruniversity.in;

## Sheet: data
ID	Metal oxide	conc	Mol_wt	N non metal	total atom in molecule	Noxygen	χ of m	χ of nm	χ of oxy	∑χ	χox	Z_metal	Zv_metal	PN_metal	(Z-Zv)/Zv_metal	1/(PN-1)_metal	Valence	Metal alpha	tot_metal_alpha	Z_nonmetal	PN_nonmetal	Zv_non metal	valence non metal	(Z-Zv)/Zv_non metal	1/(PN-1)_nonmetal	tot_oxygen_alpha	non metal alpha	sum aplha	metal_epsilon	oxygen_epsilon	epsilon of non metal	sum_epsilon	sum_epsilon/N	squared_sum alpha	sq_sum_epsilon/N	D1_Metals	D2_SemiMetals	D3_HeteroNonMetals	Metals_SumIP	SemiMetals_SumIP	Electrons_ActiveM	AtWt_ActiveM	MassNo_ActiveM	Neutons_ActiveM	IP_ActivM	X_ActivM	VWR_ActivM	Electrons_Activ_SM	AtWt_Activ_SM
1	CdCl2	1e-05	183.32	2	3	0	1.69	6.32	0	8.01	2	48	2	5	23	0.2	2	4.6	4.6	17	3	8	1	1.125	0.5	0	0.5625	5.1625	-4	0	1.8375	3.675	1.225	26.6514	1.50062	1	0	2	866	0	48	112.414	112	64	866	1.7	0.154	0	0
2	CdCl2	2e-05	183.32	2	3	0	1.69	6.32	0	8.01	2	48	2	5	23	0.2	2	4.6	4.6	17	3	8	1	1.125	0.5	0	0.5625	5.1625	-4	0	1.8375	3.675	1.225	26.6514	1.50062	1	0	2	866	0	48	112.414	112	64	866	1.7	0.154	0	0
3*	CdCl2	3e-05	183.32	2	3	0	1.69	6.32	0	8.01	2	48	2	5	23	0.2	2	4.6	4.6	17	3	8	1	1.125	0.5	0	0.5625	5.1625	-4	0	1.8375	3.675	1.225	26.6514	1.50062	1	0	2	866	0	48	112.414	112	64	866	1.7	0.154	0	0
4*	CdCl2	4e-05	183.32	2	3	0	1.69	6.32	0	8.01	2	48	2	5	23	0.2	2	4.6	4.6	17	3	8	1	1.125	0.5	0	0.5625	5.1625	-4	0	1.8375	3.675	1.225	26.6514	1.50062	1	0	2	866	0	48	112.414	112	64	866	1.7	0.154	0	0
5*	CdCl2	5e-05	183.32	2	3	0	1.69	6.32	0	8.01	2	48	2	5	23	0.2	2	4.6	4.6	17	3	8	1	1.125	0.5	0	0.5625	5.1625	-4	0	1.8375	3.675	1.225	26.6514	1.50062	1	0	2	866	0	48	112.414	112	64	866	1.7	0.154	0	0
6	CdCl2	6e-05	183.32	2	3	0	1.69	6.32	0	8.01	2	48	2	5	23	0.2	2	4.6	4.6	17	3	8	1	1.125	0.5	0	0.5625	5.1625	-4	0	1.8375	3.675	1.225	26.6514	1.50062	1	0	2	866	0	48	112.414	112	64	866	1.7	0.154	0	0
7*	CdCl2	7e-05	183.32	2	3	0	1.69	6.32	0	8.01	2	48	2	5	23	0.2	2	4.6	4.6	17	3	8	1	1.125	0.5	0	0.5625	5.1625	-4	0	1.8375	3.675	1.225	26.6514	1.50062	1	0	2	866	0	48	112.414	112	64	866	1.7	0.154	0	0
8	CdCl2	8e-05	183.32	2	3	0	1.69	6.32	0	8.01	2	48	2	5	23	0.2	2	4.6	4.6	17	3	8	1	1.125	0.5	0	0.5625	5.1625	-4	0	1.8375	3.675	1.225	26.6514	1.50062	1	0	2	866	0	48	112.414	112	64	866	1.7	0.154	0	0
9	CdCl2	9e-05	183.32	2	3	0	1.69	6.32	0	8.01	2	48	2	5	23	0.2	2	4.6	4.6	17	3	8	1	1.125	0.5	0	0.5625	5.1625	-4	0	1.8375	3.675	1.225	26.6514	1.50062	1	0	2	866	0	48	112.414	112	64	866	1.7	0.154	0	0
10	ZnCl2	6e-05	136.286	2	3	0	1.65	6.32	0	7.97	2	30	2	4	14	0.25	2	3.5	3.5	17	3	8	1	1.125	0.5	0	0.5625	4.0625	-2.9	0	1.8375	3.675	1.225	16.5039	1.50062	1	0	2	904.5	0	30	65.38	65	35	904.5	1.6	0.138	0	0
11	ZnCl2	9e-05	136.286	2	3	0	1.65	6.32	0	7.97	2	30	2	4	14	0.25	2	3.5	3.5	17	3	8	1	1.125	0.5	0	0.5625	4.0625	-2.9	0	1.8375	3.675	1.225	16.5039	1.50062	1	0	2	904.5	0	30	65.38	65	35	904.5	1.6	0.138	0	0
12	ZnCl2	0.00012	136.286	2	3	0	1.65	6.32	0	7.97	2	30	2	4	14	0.25	2	3.5	3.5	17	3	8	1	1.125	0.5	0	0.5625	4.0625	-2.9	0	1.8375	3.675	1.225	16.5039	1.50062	1	0	2	904.5	0	30	65.38	65	35	904.5	1.6	0.138	0	0
13	ZnCl2	0.00015	136.286	2	3	0	1.65	6.32	0	7.97	2	30	2	4	14	0.25	2	3.5	3.5	17	3	8	1	1.125	0.5	0	0.5625	4.0625	-2.9	0	1.8375	3.675	1.225	16.5039	1.50062	1	0	2	904.5	0	30	65.38	65	35	904.5	1.6	0.138	0	0
14	ZnCl2	0.00018	136.286	2	3	0	1.65	6.32	0	7.97	2	30	2	4	14	0.25	2	3.5	3.5	17	3	8	1	1.125	0.5	0	0.5625	4.0625	-2.9	0	1.8375	3.675	1.225	16.5039	1.50062	1	0	2	904.5	0	30	65.38	65	35	904.5	1.6	0.138	0	0
15	ZnCl2	0.00021	136.286	2	3	0	1.65	6.32	0	7.97	2	30	2	4	14	0.25	2	3.5	3.5	17	3	8	1	1.125	0.5	0	0.5625	4.0625	-2.9	0	1.8375	3.675	1.225	16.5039	1.50062	1	0	2	904.5	0	30	65.38	65	35	904.5	1.6	0.138	0	0
16	ZnCl2	0.00024	136.286	2	3	0	1.65	6.32	0	7.97	2	30	2	4	14	0.25	2	3.5	3.5	17	3	8	1	1.125	0.5	0	0.5625	4.0625	-2.9	0	1.8375	3.675	1.225	16.5039	1.50062	1	0	2	904.5	0	30	65.38	65	35	904.5	1.6	0.138	0	0
17	ZnCl2	0.00027	136.286	2	3	0	1.65	6.32	0	7.97	2	30	2	4	14	0.25	2	3.5	3.5	17	3	8	1	1.125	0.5	0	0.5625	4.0625	-2.9	0	1.8375	3.675	1.225	16.5039	1.50062	1	0	2	904.5	0	30	65.38	65	35	904.5	1.6	0.138	0	0
18	ZnCl2	0.0003	136.286	2	3	0	1.65	6.32	0	7.97	2	30	2	4	14	0.25	2	3.5	3.5	17	3	8	1	1.125	0.5	0	0.5625	4.0625	-2.9	0	1.8375	3.675	1.225	16.5039	1.50062	1	0	2	904.5	0	30	65.38	65	35	904.5	1.6	0.138	0	0
19	MnCl2	0.0001	125.844	2	3	0	1.55	6.32	0	7.87	2	25	2	4	11.5	0.25	7	2.875	2.875	17	3	8	1	1.125	0.5	0	0.5625	3.4375	-2.275	0	1.8375	3.675	1.225	11.8164	1.50062	1	0	2	716	0	25	54.938	55	30	716	1.5	0.126	0	0
20*	MnCl2	0.0002	125.844	2	3	0	1.55	6.32	0	7.87	2	25	2	4	11.5	0.25	7	2.875	2.875	17	3	8	1	1.125	0.5	0	0.5625	3.4375	-2.275	0	1.8375	3.675	1.225	11.8164	1.50062	1	0	2	716	0	25	54.938	55	30	716	1.5	0.126	0	0
21	MnCl2	0.0003	125.844	2	3	0	1.55	6.32	0	7.87	2	25	2	4	11.5	0.25	7	2.875	2.875	17	3	8	1	1.125	0.5	0	0.5625	3.4375	-2.275	0	1.8375	3.675	1.225	11.8164	1.50062	1	0	2	716	0	25	54.938	55	30	716	1.5	0.126	0	0
22	MnCl2	0.0004	125.844	2	3	0	1.55	6.32	0	7.87	2	25	2	4	11.5	0.25	7	2.875	2.875	17	3	8	1	1.125	0.5	0	0.5625	3.4375	-2.275	0	1.8375	3.675	1.225	11.8164	1.50062	1	0	2	716	0	25	54.938	55	30	716	1.5	0.126	0	0
23	MnCl2	0.0005	125.844	2	3	0	1.55	6.32	0	7.87	2	25	2	4	11.5	0.25	7	2.875	2.875	17	3	8	1	1.125	0.5	0	0.5625	3.4375	-2.275	0	1.8375	3.675	1.225	11.8164	1.50062	1	0	2	716	0	25	54.938	55	30	716	1.5	0.126	0	0
24	MnCl2	0.0006	125.844	2	3	0	1.55	6.32	0	7.87	2	25	2	4	11.5	0.25	7	2.875	2.875	17	3	8	1	1.125	0.5	0	0.5625	3.4375	-2.275	0	1.8375	3.675	1.225	11.8164	1.50062	1	0	2	716	0	25	54.938	55	30	716	1.5	0.126	0	0
25	MnCl2	0.0007	125.844	2	3	0	1.55	6.32	0	7.87	2	25	2	4	11.5	0.25	7	2.875	2.875	17	3	8	1	1.125	0.5	0	0.5625	3.4375	-2.275	0	1.8375	3.675	1.225	11.8164	1.50062	1	0	2	716	0	25	54.938	55	30	716	1.5	0.126	0	0
26	MnCl2	0.0008	125.844	2	3	0	1.55	6.32	0	7.87	2	25	2	4	11.5	0.25	7	2.875	2.875	17	3	8	1	1.125	0.5	0	0.5625	3.4375	-2.275	0	1.8375	3.675	1.225	11.8164	1.50062	1	0	2	716	0	25	54.938	55	30	716	1.5	0.126	0	0
27*	MnCl2	0.0009	125.844	2	3	0	1.55	6.32	0	7.87	2	25	2	4	11.5	0.25	7	2.875	2.875	17	3	8	1	1.125	0.5	0	0.5625	3.4375	-2.275	0	1.8375	3.675	1.225	11.8164	1.50062	1	0	2	716	0	25	54.938	55	30	716	1.5	0.126	0	0
28	CoCl2	1e-05	129.839	2	3	0	1.88	6.32	0	8.2	4	27	2	4	12.5	0.25	10	3.125	3.125	17	3	8	1	1.125	0.5	0	0.5625	3.6875	-2.525	0	1.8375	3.675	1.225	13.5977	1.50062	1	0	2	757	0	27	58.933	59	32	757	1.8	0.125	0	0
29	CoCl2	2e-05	129.839	2	3	0	1.88	6.32	0	8.2	4	27	2	4	12.5	0.25	10	3.125	3.125	17	3	8	1	1.125	0.5	0	0.5625	3.6875	-2.525	0	1.8375	3.675	1.225	13.5977	1.50062	1	0	2	757	0	27	58.933	59	32	757	1.8	0.125	0	0
30	CoCl2	3e-05	129.839	2	3	0	1.88	6.32	0	8.2	4	27	2	4	12.5	0.25	10	3.125	3.125	17	3	8	1	1.125	0.5	0	0.5625	3.6875	-2.525	0	1.8375	3.675	1.225	13.5977	1.50062	1	0	2	757	0	27	58.933	59	32	757	1.8	0.125	0	0
31	CoCl2	4e-05	129.839	2	3	0	1.88	6.32	0	8.2	4	27	2	4	12.5	0.25	10	3.125	3.125	17	3	8	1	1.125	0.5	0	0.5625	3.6875	-2.525	0	1.8375	3.675	1.225	13.5977	1.50062	1	0	2	757	0	27	58.933	59	32	757	1.8	0.125	0	0
32	CoCl2	5e-05	129.839	2	3	0	1.88	6.32	0	8.2	4	27	2	4	12.5	0.25	10	3.125	3.125	17	3	8	1	1.125	0.5	0	0.5625	3.6875	-2.525	0	1.8375	3.675	1.225	13.5977	1.50062	1	0	2	757	0	27	58.933	59	32	757	1.8	0.125	0	0
33*	CoCl2	6e-05	129.839	2	3	0	1.88	6.32	0	8.2	4	27	2	4	12.5	0.25	10	3.125	3.125	17	3	8	1	1.125	0.5	0	0.5625	3.6875	-2.525	0	1.8375	3.675	1.225	13.5977	1.50062	1	0	2	757	0	27	58.933	59	32	757	1.8	0.125	0	0
34	CoCl2	7e-05	129.839	2	3	0	1.88	6.32	0	8.2	4	27	2	4	12.5	0.25	10	3.125	3.125	17	3	8	1	1.125	0.5	0	0.5625	3.6875	-2.525	0	1.8375	3.675	1.225	13.5977	1.50062	1	0	2	757	0	27	58.933	59	32	757	1.8	0.125	0	0
35	CoCl2	8e-05	129.839	2	3	0	1.88	6.32	0	8.2	4	27	2	4	12.5	0.25	10	3.125	3.125	17	3	8	1	1.125	0.5	0	0.5625	3.6875	-2.525	0	1.8375	3.675	1.225	13.5977	1.50062	1	0	2	757	0	27	58.933	59	32	757	1.8	0.125	0	0
36*	CoCl2	9e-05	129.839	2	3	0	1.88	6.32	0	8.2	4	27	2	4	12.5	0.25	10	3.125	3.125	17	3	8	1	1.125	0.5	0	0.5625	3.6875	-2.525	0	1.8375	3.675	1.225	13.5977	1.50062	1	0	2	757	0	27	58.933	59	32	757	1.8	0.125	0	0
37	CuSO4	3e-05	159.609	1	6	4	1.9	6.02	13.76	21.68	2	29	2	4	13.5	0.25	2	3.375	3.375	16	3	6	2	1.66667	0.5	1.32	0.833333	5.52833	-2.775	3.72	0.966667	-6.41333	-1.06889	30.5625	1.14252	1	0	5	743.5	0	29	63.546	64	35	743.5	1.9	0.128	0	0
38*	CuSO4	6e-05	159.609	1	6	4	1.9	6.02	13.76	21.68	2	29	2	4	13.5	0.25	2	3.375	3.375	16	3	6	2	1.66667	0.5	1.32	0.833333	5.52833	-2.775	3.72	0.966667	-6.41333	-1.06889	30.5625	1.14252	1	0	5	743.5	0	29	63.546	64	35	743.5	1.9	0.128	0	0
39	CuSO4	9e-05	159.609	1	6	4	1.9	6.02	13.76	21.68	2	29	2	4	13.5	0.25	2	3.375	3.375	16	3	6	2	1.66667	0.5	1.32	0.833333	5.52833	-2.775	3.72	0.966667	-6.41333	-1.06889	30.5625	1.14252	1	0	5	743.5	0	29	63.546	64	35	743.5	1.9	0.128	0	0
40*	CuSO4	0.00012	159.609	1	6	4	1.9	6.02	13.76	21.68	2	29	2	4	13.5	0.25	2	3.375	3.375	16	3	6	2	1.66667	0.5	1.32	0.833333	5.52833	-2.775	3.72	0.966667	-6.41333	-1.06889	30.5625	1.14252	1	0	5	743.5	0	29	63.546	64	35	743.5	1.9	0.128	0	0
41	CuSO4	0.00015	159.609	1	6	4	1.9	6.02	13.76	21.68	2	29	2	4	13.5	0.25	2	3.375	3.375	16	3	6	2	1.66667	0.5	1.32	0.833333	5.52833	-2.775	3.72	0.966667	-6.41333	-1.06889	30.5625	1.14252	1	0	5	743.5	0	29	63.546	64	35	743.5	1.9	0.128	0	0
42	CuSO4	0.00018	159.609	1	6	4	1.9	6.02	13.76	21.68	2	29	2	4	13.5	0.25	2	3.375	3.375	16	3	6	2	1.66667	0.5	1.32	0.833333	5.52833	-2.775	3.72	0.966667	-6.41333	-1.06889	30.5625	1.14252	1	0	5	743.5	0	29	63.546	64	35	743.5	1.9	0.128	0	0
43	CuSO4	0.00021	159.609	1	6	4	1.9	6.02	13.76	21.68	2	29	2	4	13.5	0.25	2	3.375	3.375	16	3	6	2	1.66667	0.5	1.32	0.833333	5.52833	-2.775	3.72	0.966667	-6.41333	-1.06889	30.5625	1.14252	1	0	5	743.5	0	29	63.546	64	35	743.5	1.9	0.128	0	0
44	CuSO4	0.00024	159.609	1	6	4	1.9	6.02	13.76	21.68	2	29	2	4	13.5	0.25	2	3.375	3.375	16	3	6	2	1.66667	0.5	1.32	0.833333	5.52833	-2.775	3.72	0.966667	-6.41333	-1.06889	30.5625	1.14252	1	0	5	743.5	0	29	63.546	64	35	743.5	1.9	0.128	0	0
45	CuSO4	0.00027	159.609	1	6	4	1.9	6.02	13.76	21.68	2	29	2	4	13.5	0.25	2	3.375	3.375	16	3	6	2	1.66667	0.5	1.32	0.833333	5.52833	-2.775	3.72	0.966667	-6.41333	-1.06889	30.5625	1.14252	1	0	5	743.5	0	29	63.546	64	35	743.5	1.9	0.128	0	0
46	NiCl2	0.0001	58.44	2	3	0	1.91	6.32	0	8.23	2	28	2	4	13	0.25	2	3.25	3.25	17	3	8	1	1.125	0.5	0	0.5625	3.8125	-2.65	0	1.8375	3.675	1.225	14.5352	1.50062	1	0	2	735	0	28	58.6934	59	31	735	1.8	0.124	0	0
47	NiCl2	0.0002	58.44	2	3	0	1.91	6.32	0	8.23	2	28	2	4	13	0.25	2	3.25	3.25	17	3	8	1	1.125	0.5	0	0.5625	3.8125	-2.65	0	1.8375	3.675	1.225	14.5352	1.50062	1	0	2	735	0	28	58.6934	59	31	735	1.8	0.124	0	0
48	NiCl2	0.0003	58.44	2	3	0	1.91	6.32	0	8.23	2	28	2	4	13	0.25	2	3.25	3.25	17	3	8	1	1.125	0.5	0	0.5625	3.8125	-2.65	0	1.8375	3.675	1.225	14.5352	1.50062	1	0	2	735	0	28	58.6934	59	31	735	1.8	0.124	0	0
49	NiCl2	0.0004	58.44	2	3	0	1.91	6.32	0	8.23	2	28	2	4	13	0.25	2	3.25	3.25	17	3	8	1	1.125	0.5	0	0.5625	3.8125	-2.65	0	1.8375	3.675	1.225	14.5352	1.50062	1	0	2	735	0	28	58.6934	59	31	735	1.8	0.124	0	0
50	NiCl2	0.0005	58.44	2	3	0	1.91	6.32	0	8.23	2	28	2	4	13	0.25	2	3.25	3.25	17	3	8	1	1.125	0.5	0	0.5625	3.8125	-2.65	0	1.8375	3.675	1.225	14.5352	1.50062	1	0	2	735	0	28	58.6934	59	31	735	1.8	0.124	0	0
51	NiCl2	0.0006	58.44	2	3	0	1.91	6.32	0	8.23	2	28	2	4	13	0.25	2	3.25	3.25	17	3	8	1	1.125	0.5	0	0.5625	3.8125	-2.65	0	1.8375	3.675	1.225	14.5352	1.50062	1	0	2	735	0	28	58.6934	59	31	735	1.8	0.124	0	0
52	NiCl2	0.0007	58.44	2	3	0	1.91	6.32	0	8.23	2	28	2	4	13	0.25	2	3.25	3.25	17	3	8	1	1.125	0.5	0	0.5625	3.8125	-2.65	0	1.8375	3.675	1.225	14.5352	1.50062	1	0	2	735	0	28	58.6934	59	31	735	1.8	0.124	0	0
53*	NiCl2	0.0008	58.44	2	3	0	1.91	6.32	0	8.23	2	28	2	4	13	0.25	2	3.25	3.25	17	3	8	1	1.125	0.5	0	0.5625	3.8125	-2.65	0	1.8375	3.675	1.225	14.5352	1.50062	1	0	2	735	0	28	58.6934	59	31	735	1.8	0.124	0	0
54	NiCl2	0.0009	58.44	2	3	0	1.91	6.32	0	8.23	2	28	2	4	13	0.25	2	3.25	3.25	17	3	8	1	1.125	0.5	0	0.5625	3.8125	-2.65	0	1.8375	3.675	1.225	14.5352	1.50062	1	0	2	735	0	28	58.6934	59	31	735	1.8	0.124	0	0
55	Pb (NO3) 2	0.0001	331.2	2	8	6	2.33	6.08	20.64	29.05	2	82	2	5	40	0.2	4	8	8	7	2	5	1	0.4	1	1.65	0.4	10.05	-7.4	4.05	1.1	-38.15	-4.76875	101.003	22.741	1	0	8	715.4	0	82	207.2	207	125	715.4	1.8	0.154	0	0
56	Pb (NO3) 2	0.0002	331.2	2	8	6	2.33	6.08	20.64	29.05	2	82	2	5	40	0.2	4	8	8	7	2	5	1	0.4	1	1.65	0.4	10.05	-7.4	4.05	1.1	-38.15	-4.76875	101.003	22.741	1	0	8	715.4	0	82	207.2	207	125	715.4	1.8	0.154	0	0
57	Pb (NO3) 2	0.0003	331.2	2	8	6	2.33	6.08	20.64	29.05	2	82	2	5	40	0.2	4	8	8	7	2	5	1	0.4	1	1.65	0.4	10.05	-7.4	4.05	1.1	-38.15	-4.76875	101.003	22.741	1	0	8	715.4	0	82	207.2	207	125	715.4	1.8	0.154	0	0
58	Pb (NO3) 2	0.0004	331.2	2	8	6	2.33	6.08	20.64	29.05	2	82	2	5	40	0.2	4	8	8	7	2	5	1	0.4	1	1.65	0.4	10.05	-7.4	4.05	1.1	-38.15	-4.76875	101.003	22.741	1	0	8	715.4	0	82	207.2	207	125	715.4	1.8	0.154	0	0
59*	Pb (NO3) 2	0.0005	331.2	2	8	6	2.33	6.08	20.64	29.05	2	82	2	5	40	0.2	4	8	8	7	2	5	1	0.4	1	1.65	0.4	10.05	-7.4	4.05	1.1	-38.15	-4.76875	101.003	22.741	1	0	8	715.4	0	82	207.2	207	125	715.4	1.8	0.154	0	0
60	Pb (NO3) 2	0.0006	331.2	2	8	6	2.33	6.08	20.64	29.05	2	82	2	5	40	0.2	4	8	8	7	2	5	1	0.4	1	1.65	0.4	10.05	-7.4	4.05	1.1	-38.15	-4.76875	101.003	22.741	1	0	8	715.4	0	82	207.2	207	125	715.4	1.8	0.154	0	0
61	Pb (NO3) 2	0.0007	331.2	2	8	6	2.33	6.08	20.64	29.05	2	82	2	5	40	0.2	4	8	8	7	2	5	1	0.4	1	1.65	0.4	10.05	-7.4	4.05	1.1	-38.15	-4.76875	101.003	22.741	1	0	8	715.4	0	82	207.2	207	125	715.4	1.8	0.154	0	0
62*	Pb (NO3) 2	0.0008	331.2	2	8	6	2.33	6.08	20.64	29.05	2	82	2	5	40	0.2	4	8	8	7	2	5	1	0.4	1	1.65	0.4	10.05	-7.4	4.05	1.1	-38.15	-4.76875	101.003	22.741	1	0	8	715.4	0	82	207.2	207	125	715.4	1.8	0.154	0	0
63	Pb (NO3) 2	0.0009	331.2	2	8	6	2.33	6.08	20.64	29.05	2	82	2	5	40	0.2	4	8	8	7	2	5	1	0.4	1	1.65	0.4	10.05	-7.4	4.05	1.1	-38.15	-4.76875	101.003	22.741	1	0	8	715.4	0	82	207.2	207	125	715.4	1.8	0.154	0	0
64	SbCl3	5e-06	228.13	3	4	0	2.05	9.48	0	11.53	3	51	3	5	16	0.2	5	3.2	3.2	17	3	8	1	1.125	0.5	0	0.5625	3.7625	-2.3	0	1.8375	5.5125	1.37812	14.1564	1.89923	0	1	3	0	834	0	0	0	0	0	0	0	51	121.76
65	SbCl3	1e-05	228.13	3	4	0	2.05	9.48	0	11.53	3	51	3	5	16	0.2	5	3.2	3.2	17	3	8	1	1.125	0.5	0	0.5625	3.7625	-2.3	0	1.8375	5.5125	1.37812	14.1564	1.89923	0	1	3	0	834	0	0	0	0	0	0	0	51	121.76
66*	SbCl3	1.5e-05	228.13	3	4	0	2.05	9.48	0	11.53	3	51	3	5	16	0.2	5	3.2	3.2	17	3	8	1	1.125	0.5	0	0.5625	3.7625	-2.3	0	1.8375	5.5125	1.37812	14.1564	1.89923	0	1	3	0	834	0	0	0	0	0	0	0	51	121.76
67	SbCl3	2e-05	228.13	3	4	0	2.05	9.48	0	11.53	3	51	3	5	16	0.2	5	3.2	3.2	17	3	8	1	1.125	0.5	0	0.5625	3.7625	-2.3	0	1.8375	5.5125	1.37812	14.1564	1.89923	0	1	3	0	834	0	0	0	0	0	0	0	51	121.76
68	SbCl3	2.5e-05	228.13	3	4	0	2.05	9.48	0	11.53	3	51	3	5	16	0.2	5	3.2	3.2	17	3	8	1	1.125	0.5	0	0.5625	3.7625	-2.3	0	1.8375	5.5125	1.37812	14.1564	1.89923	0	1	3	0	834	0	0	0	0	0	0	0	51	121.76
69	SbCl3	3e-05	228.13	3	4	0	2.05	9.48	0	11.53	3	51	3	5	16	0.2	5	3.2	3.2	17	3	8	1	1.125	0.5	0	0.5625	3.7625	-2.3	0	1.8375	5.5125	1.37812	14.1564	1.89923	0	1	3	0	834	0	0	0	0	0	0	0	51	121.76
70*	SbCl3	3.5e-05	228.13	3	4	0	2.05	9.48	0	11.53	3	51	3	5	16	0.2	5	3.2	3.2	17	3	8	1	1.125	0.5	0	0.5625	3.7625	-2.3	0	1.8375	5.5125	1.37812	14.1564	1.89923	0	1	3	0	834	0	0	0	0	0	0	0	51	121.76
71	SbCl3	4e-05	228.13	3	4	0	2.05	9.48	0	11.53	3	51	3	5	16	0.2	5	3.2	3.2	17	3	8	1	1.125	0.5	0	0.5625	3.7625	-2.3	0	1.8375	5.5125	1.37812	14.1564	1.89923	0	1	3	0	834	0	0	0	0	0	0	0	51	121.76
72	SbCl3	4.5e-05	228.13	3	4	0	2.05	9.48	0	11.53	3	51	3	5	16	0.2	5	3.2	3.2	17	3	8	1	1.125	0.5	0	0.5625	3.7625	-2.3	0	1.8375	5.5125	1.37812	14.1564	1.89923	0	1	3	0	834	0	0	0	0	0	0	0	51	121.76
[truncated: 22 more columns]
